# Supplementary material
Source: PubMed Central journal article supplement (PMC4101521)

# Vogt et al., Supplementary Figure 1

A

## Experimental outline

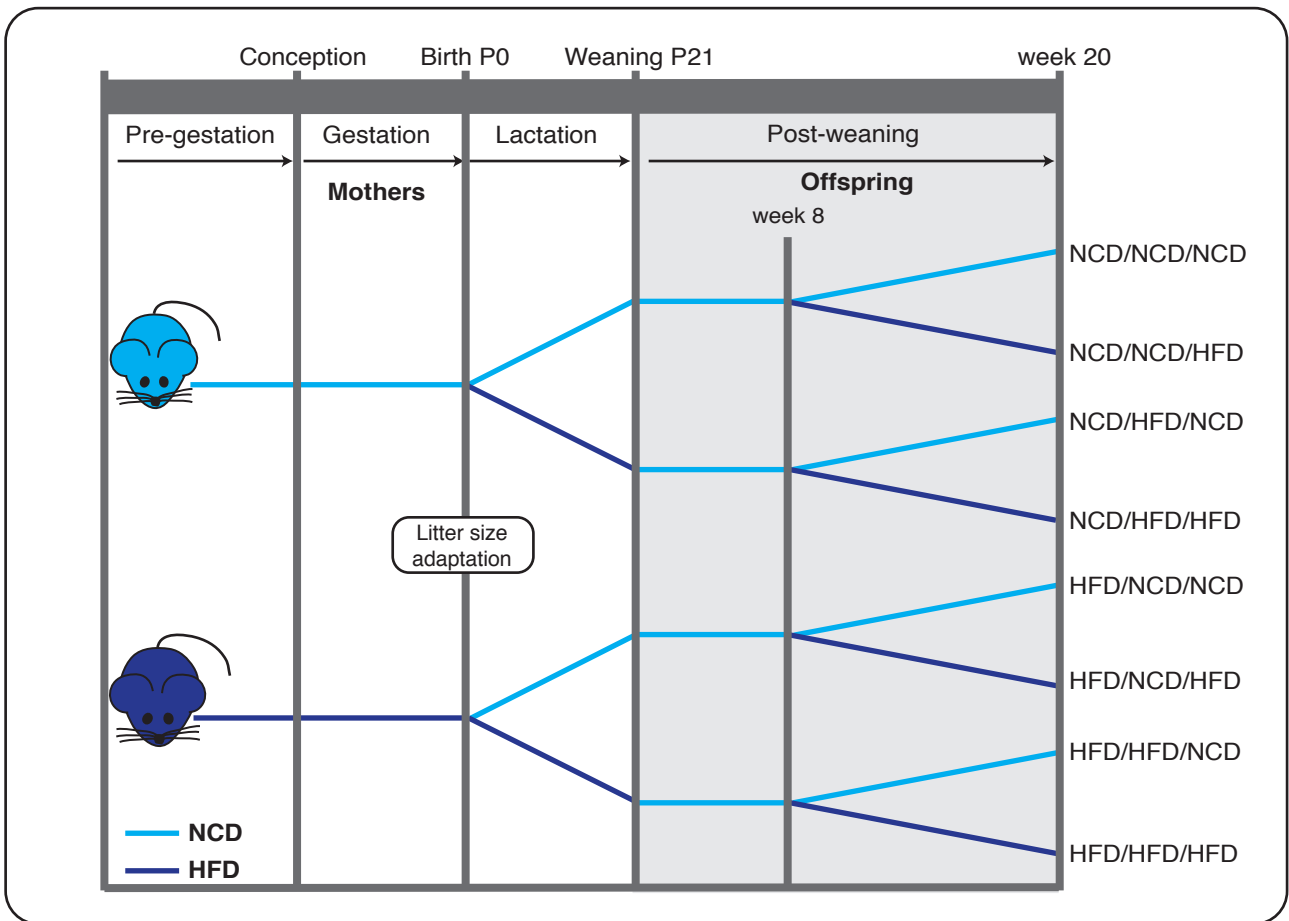

**A**

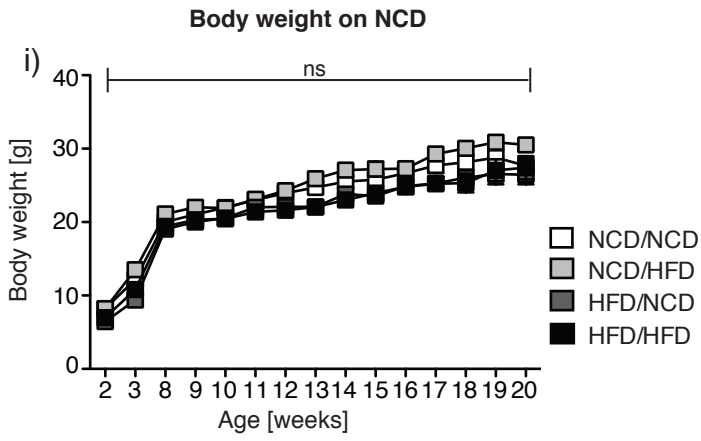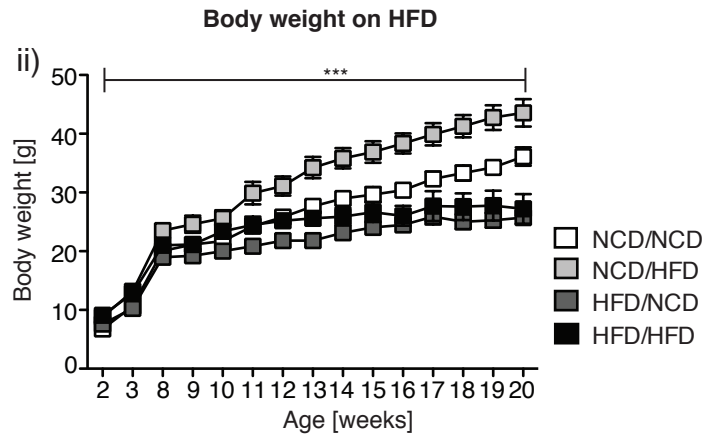

**B**

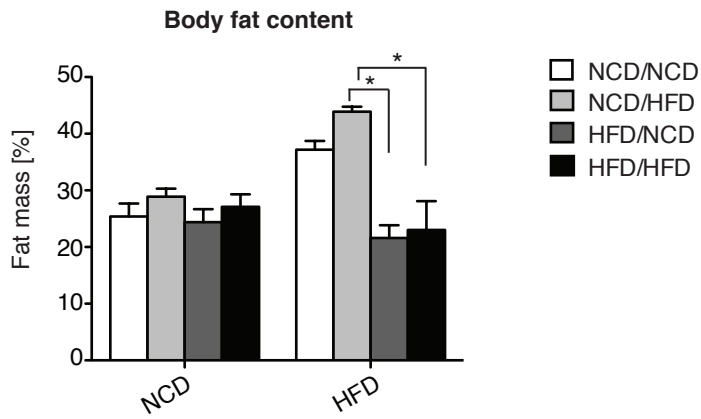

**C**

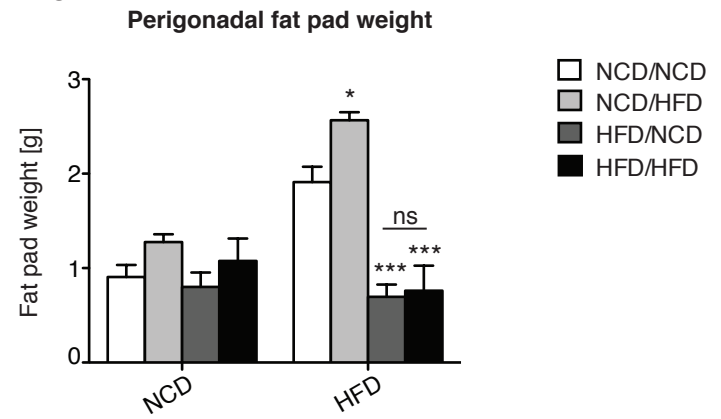

**D**

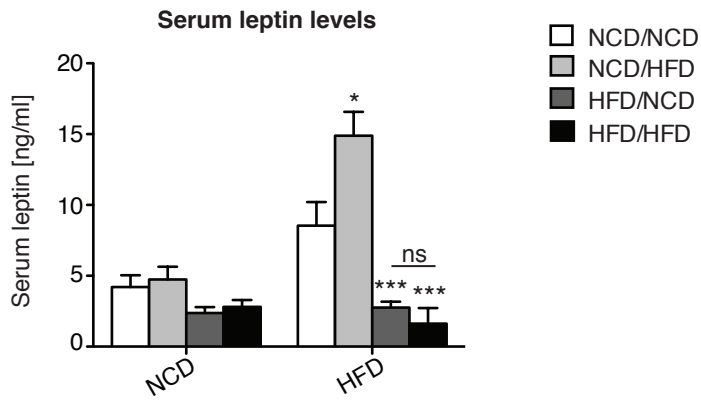

**E**

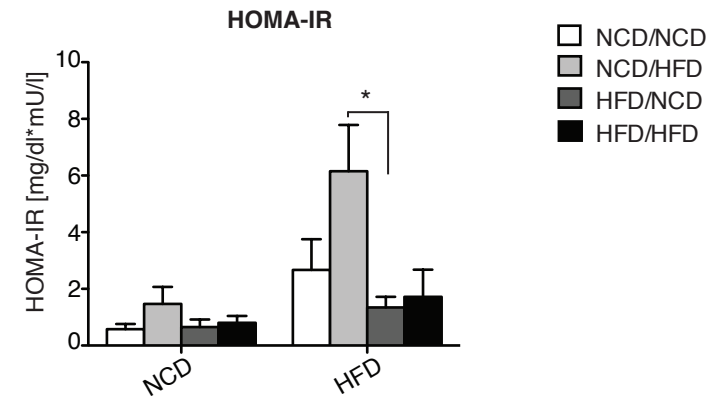

**F**

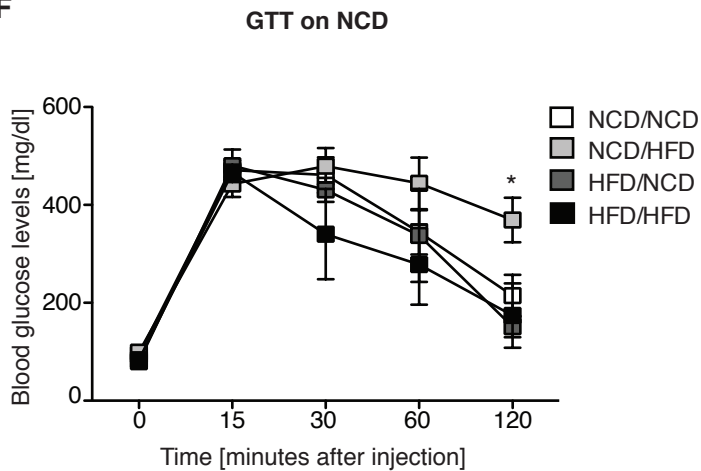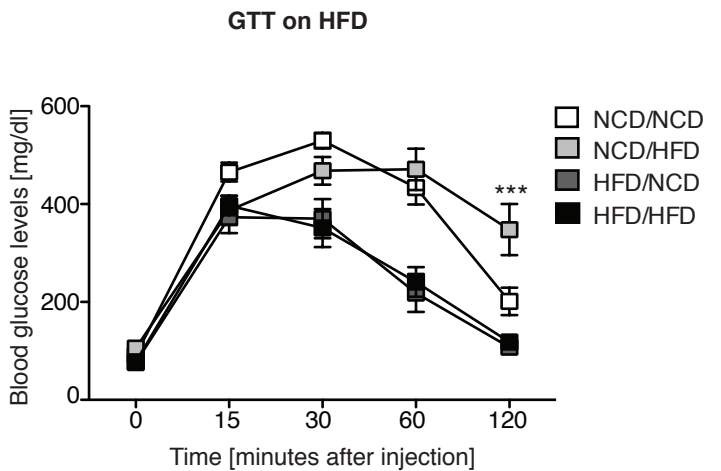

A

Inflammatory markers mRNA expression

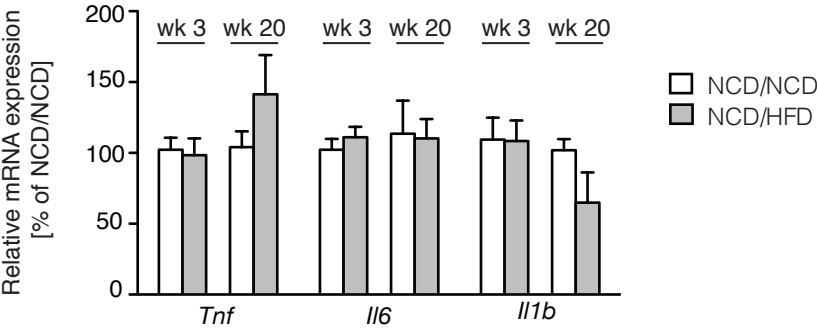

Vogt et al., Supplementary Figure 4

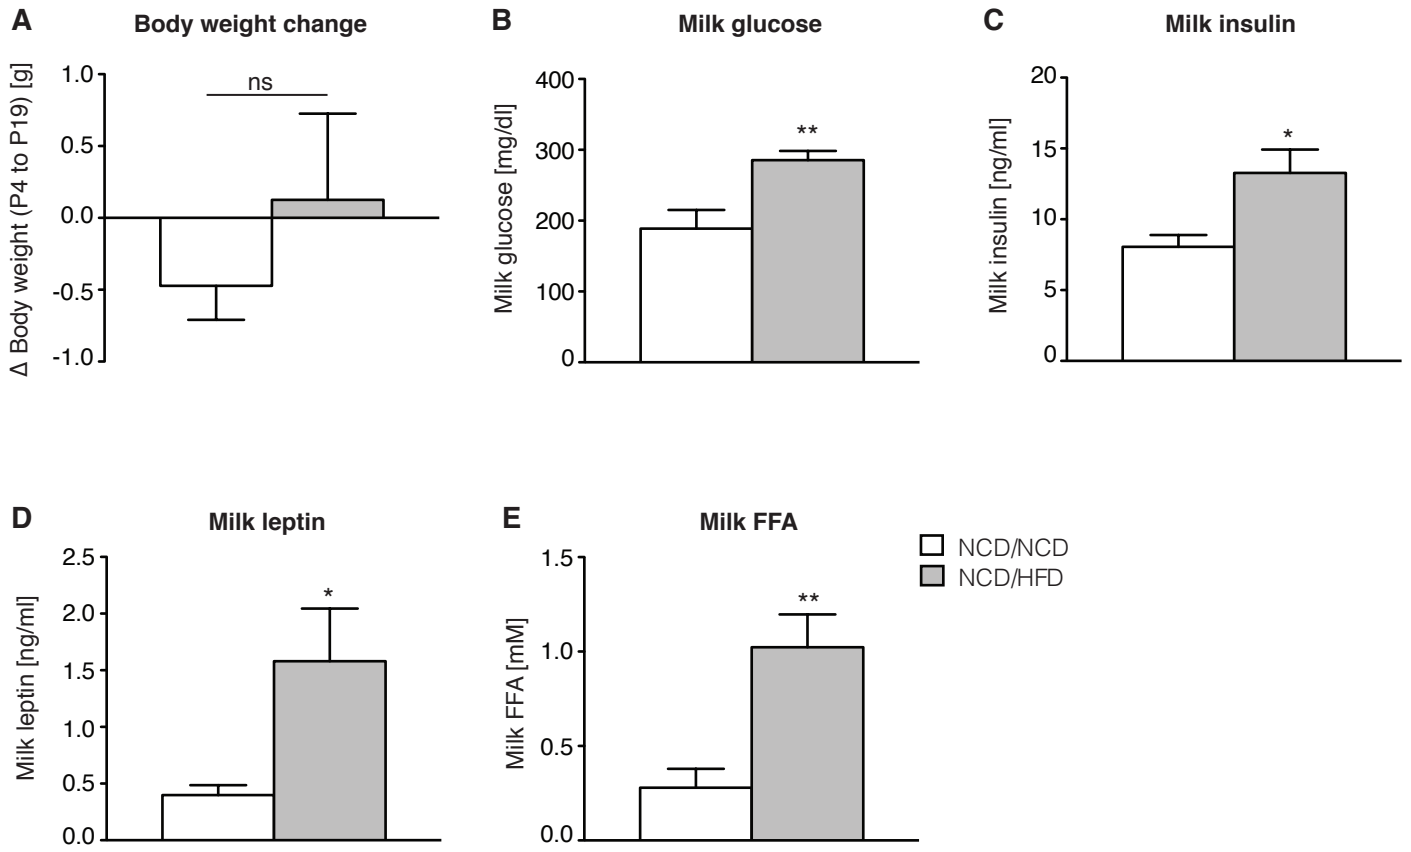

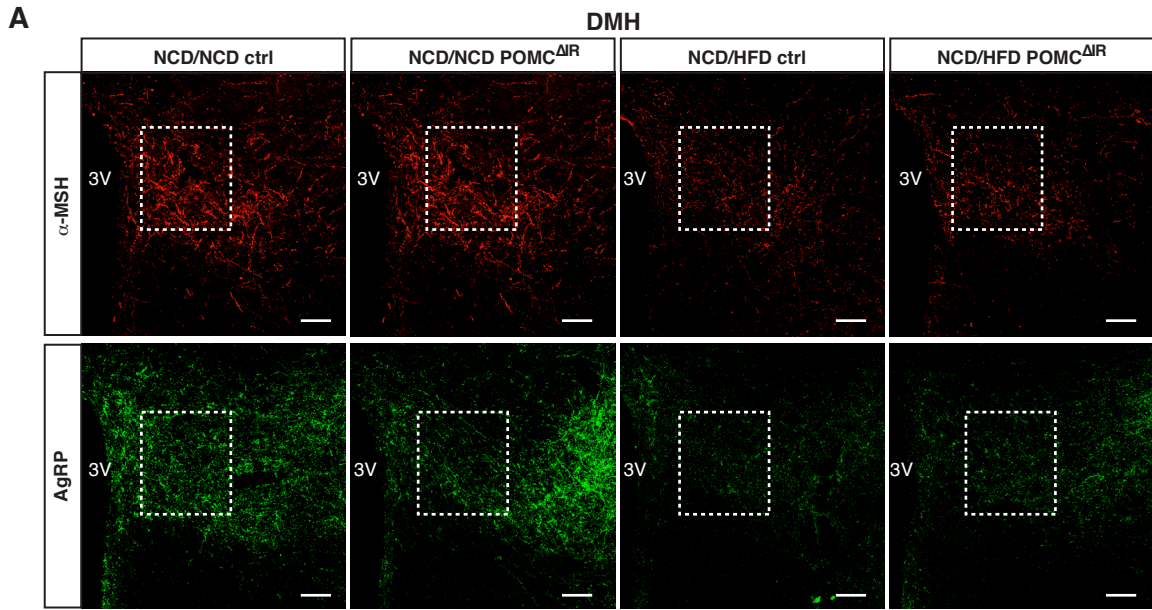

Fiber density DMH week 20

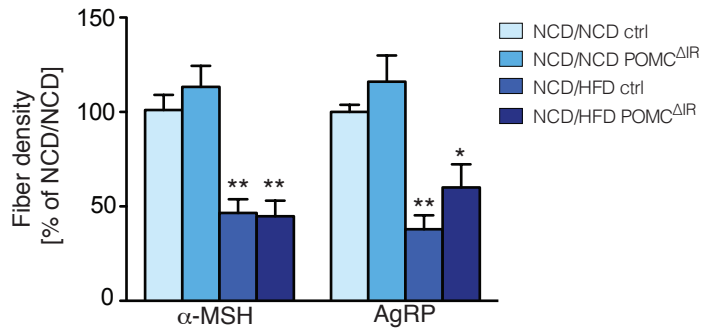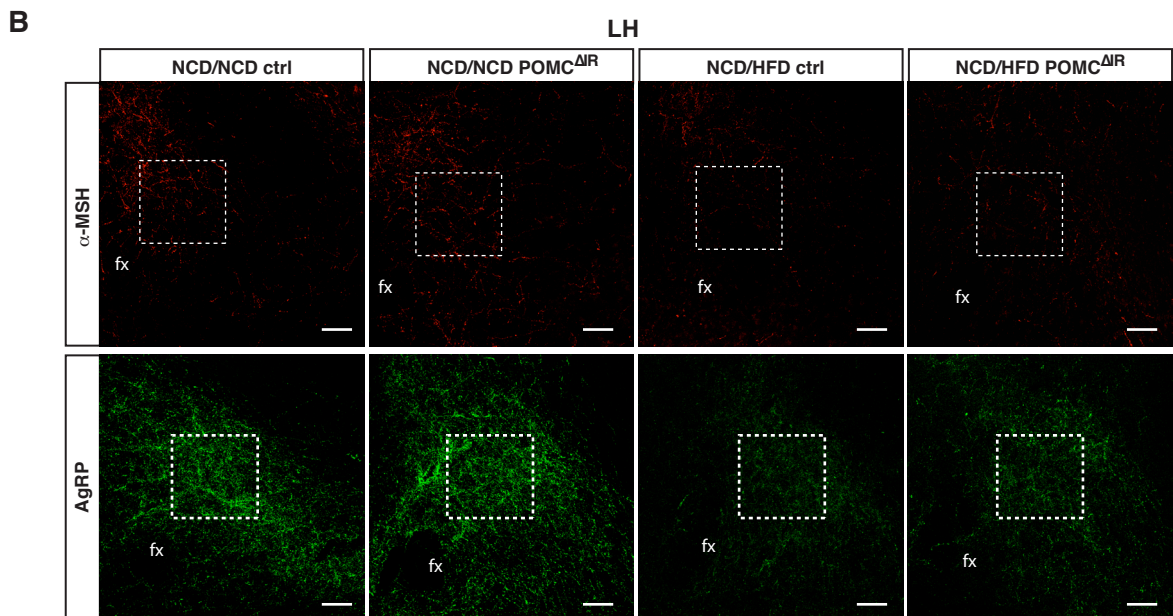

Fiber density LH week 20

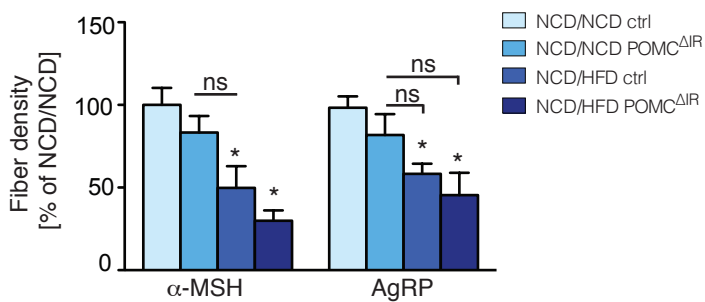

**A** Serum GLP-1 during GSIS

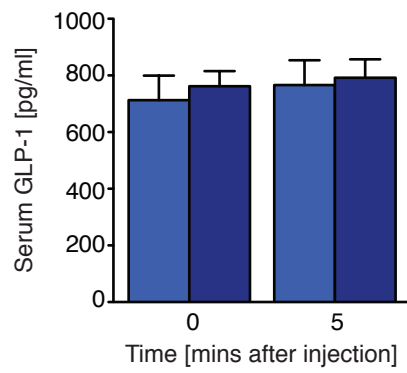

**B** Serum FFA during GSIS

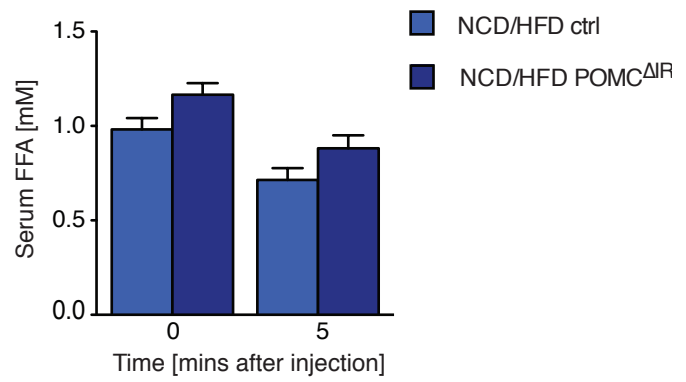

Supplement: NIHMS605742-supplement-figures.pdf [file NIHMS605742-supplement-figures.pdf]
